# Supplementary material for: Poly(ester-ether)s: III. assessment of cell behaviour on nanofibrous scaffolds of PCL, PLLA and PDX blended with amorphous PMeDX
Source: Royal Society of Chemistry journal article supplement (doi:10.1039/c4tb01350f), 2014-11-26
Supplement: c4tb01350f1.pdf [file c4tb01350f1.pdf]

### SUPPORTING INFORMATION

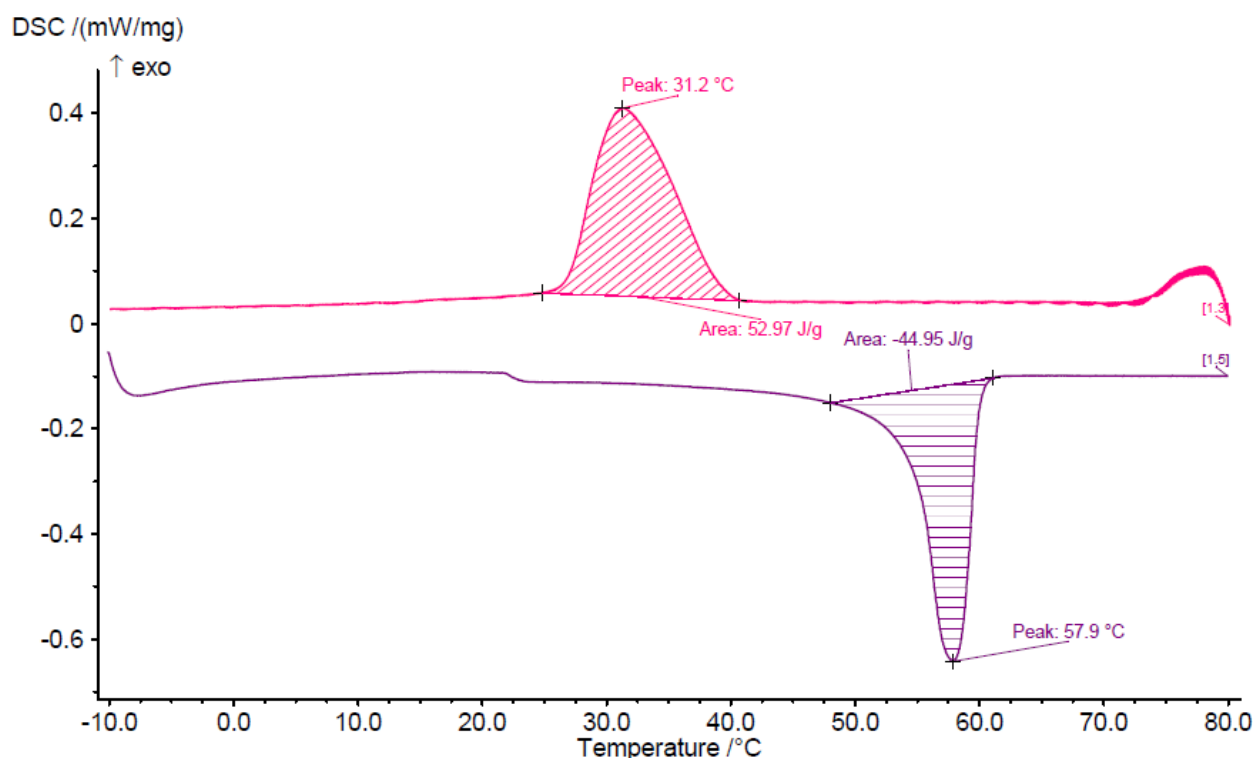

**Figure 1: DSC curve of espun PCL/PMedX (100/0)**

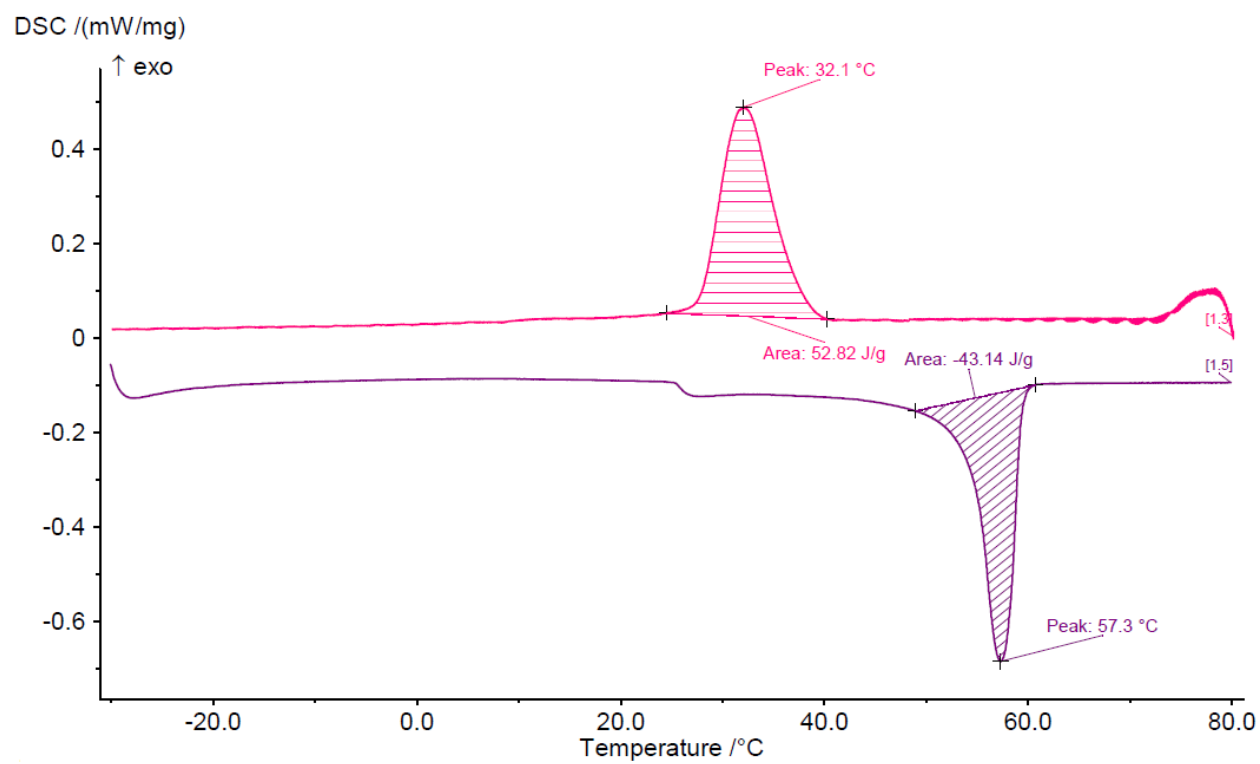

**Figure 2: DSC curve of espun PCL/PMedX (98/2)**

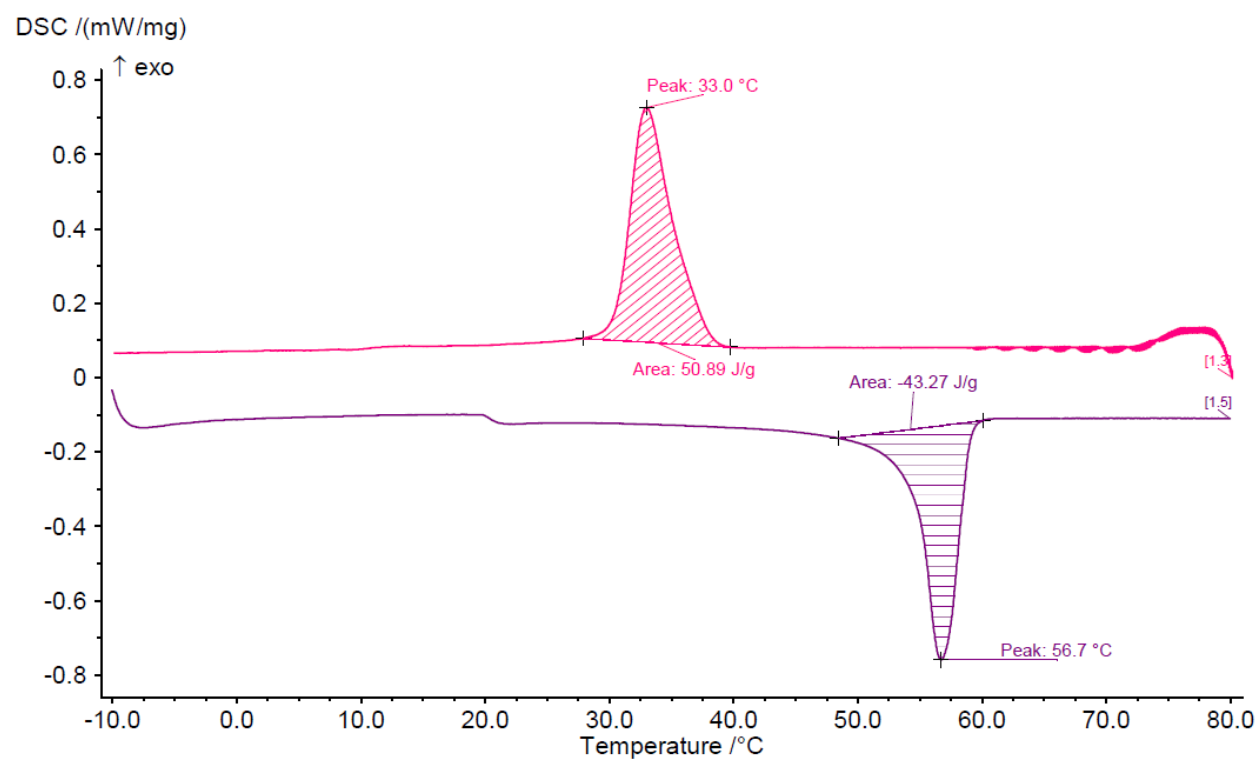

**Figure 3: DSC curve of espun PCL/PMeDX (93/7)**

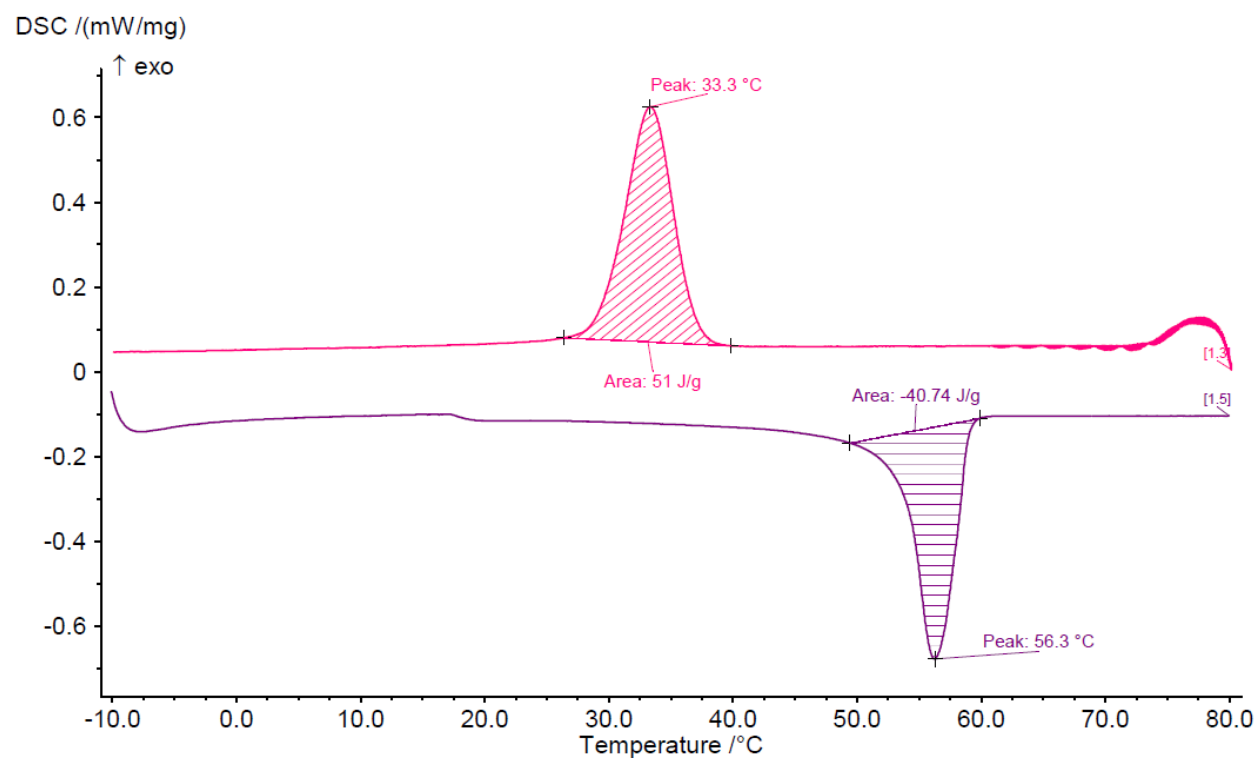

**Figure 4: DSC curve of espun PCL/PMeDX (90/10)**

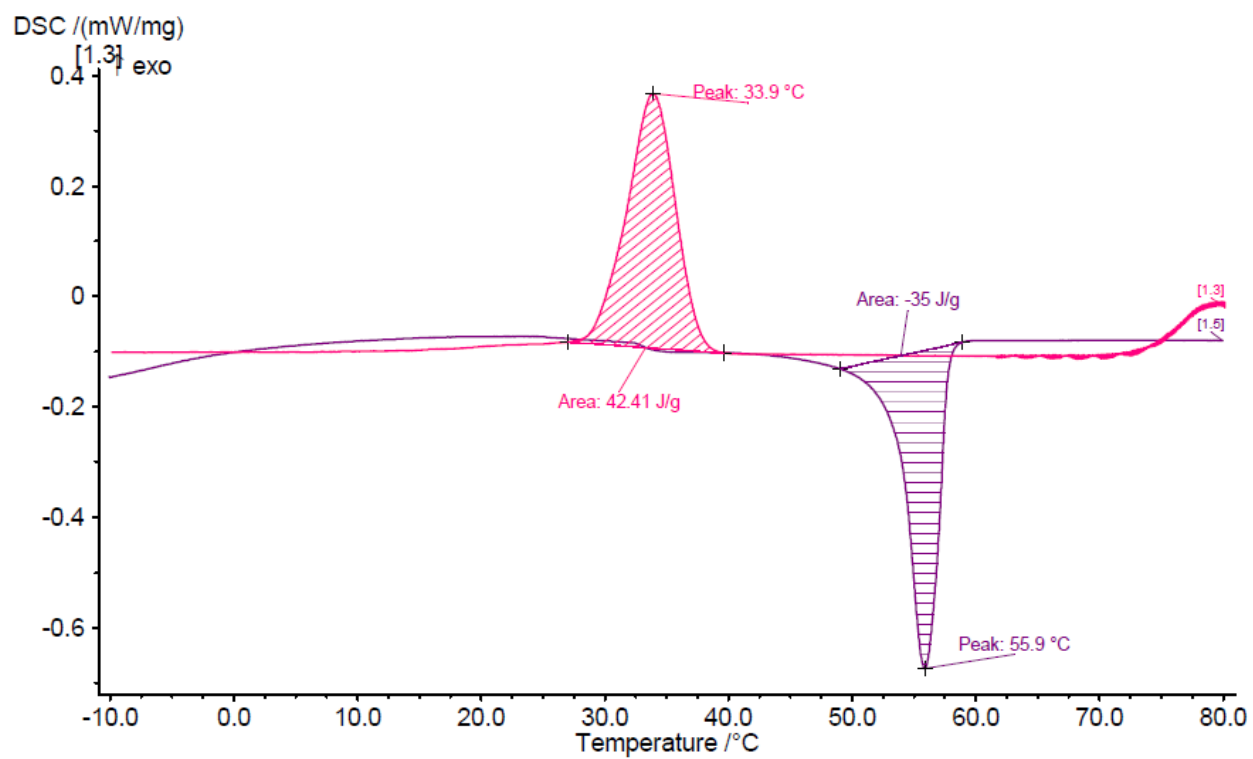

**Figure 5: DSC curve of espun PCL/PMeDX (85/15)**

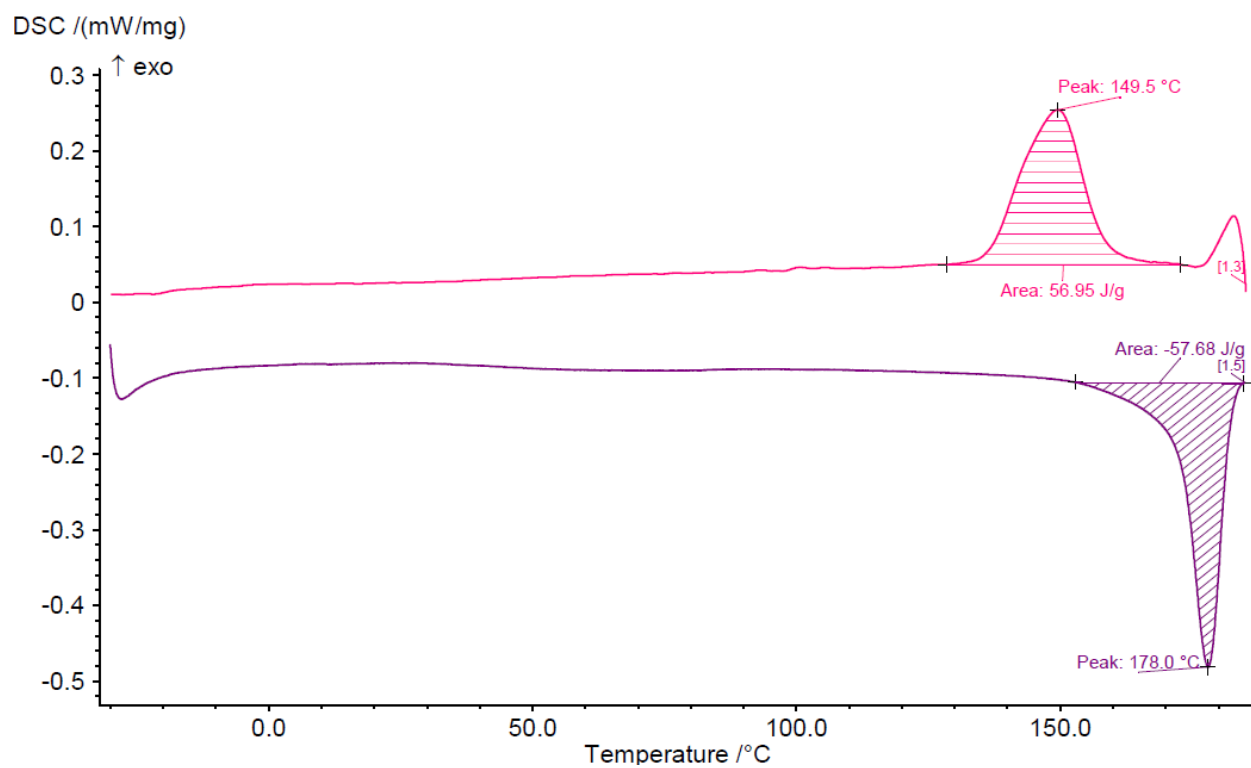

**Figure 6: DSC curve of espun PLLA/PMeDX (100/0)**

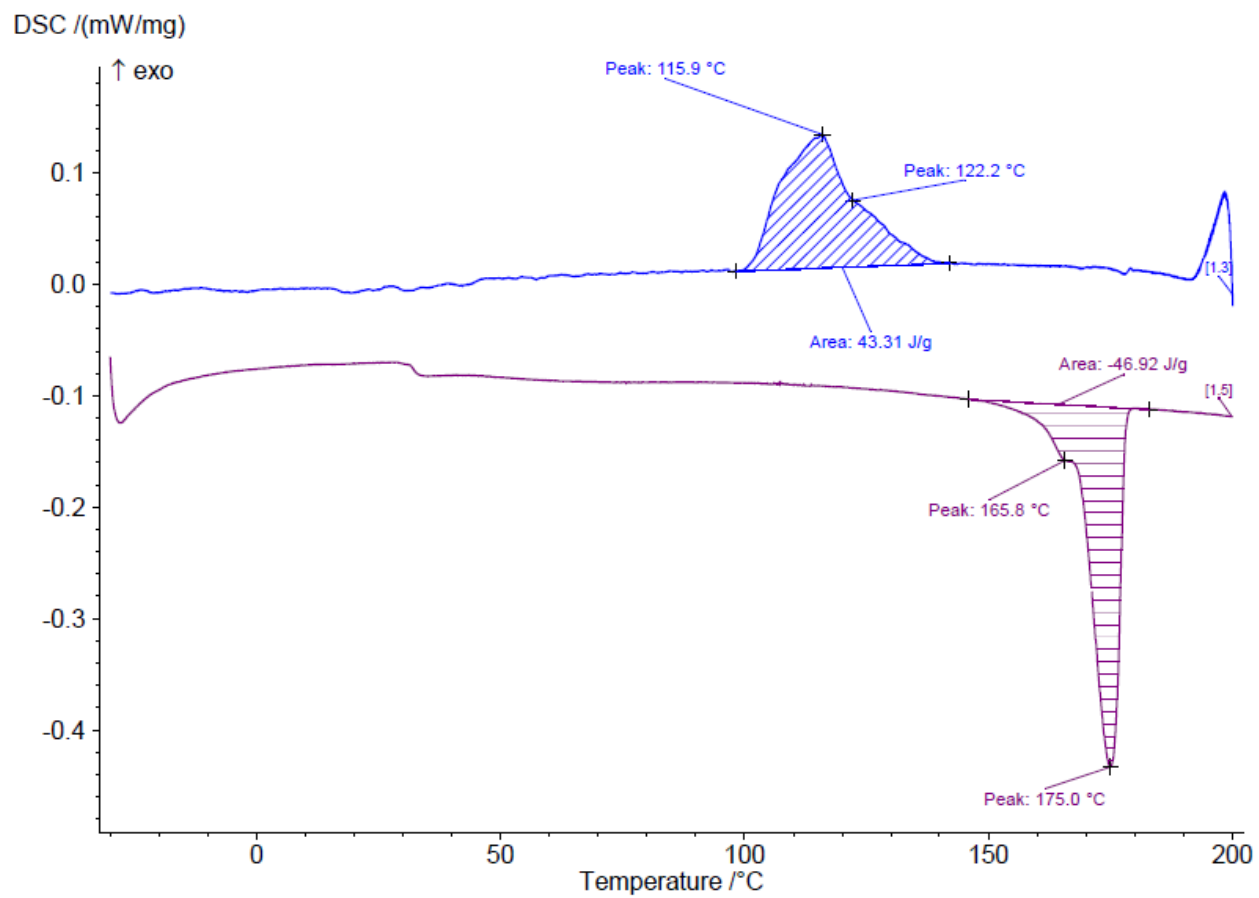

**Figure 7: DSC curve of espun PLLA/PMedX (98/2)**

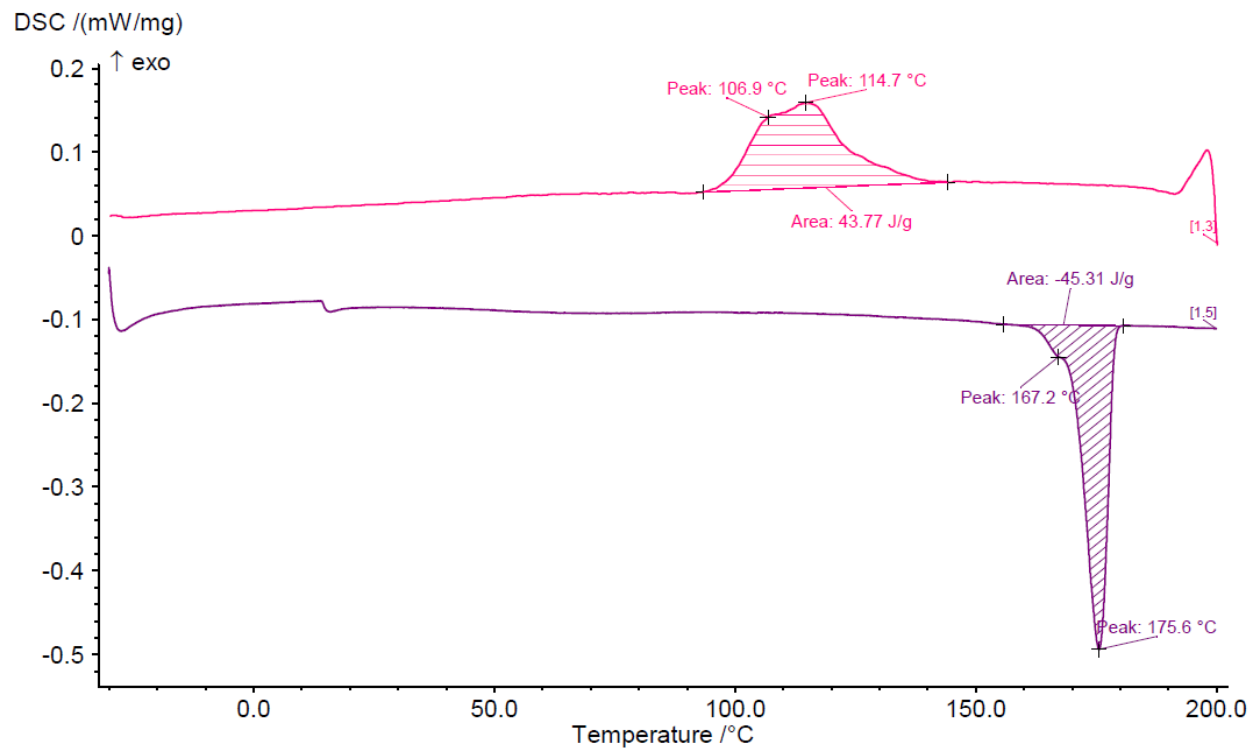

**Figure 8: DSC curve of espun PLLA/PMedX (93/7)**



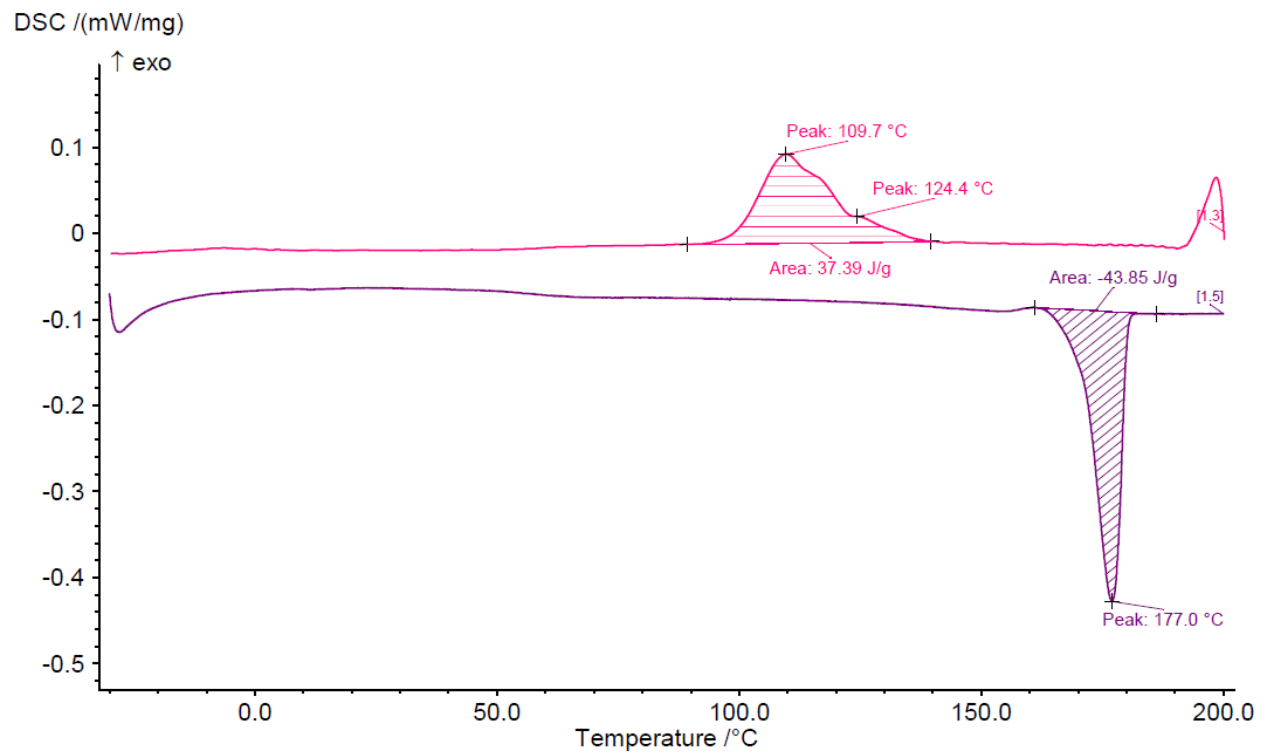

**Figure 9: DSC curve of espun PLLA/PMeDX (90/10)**

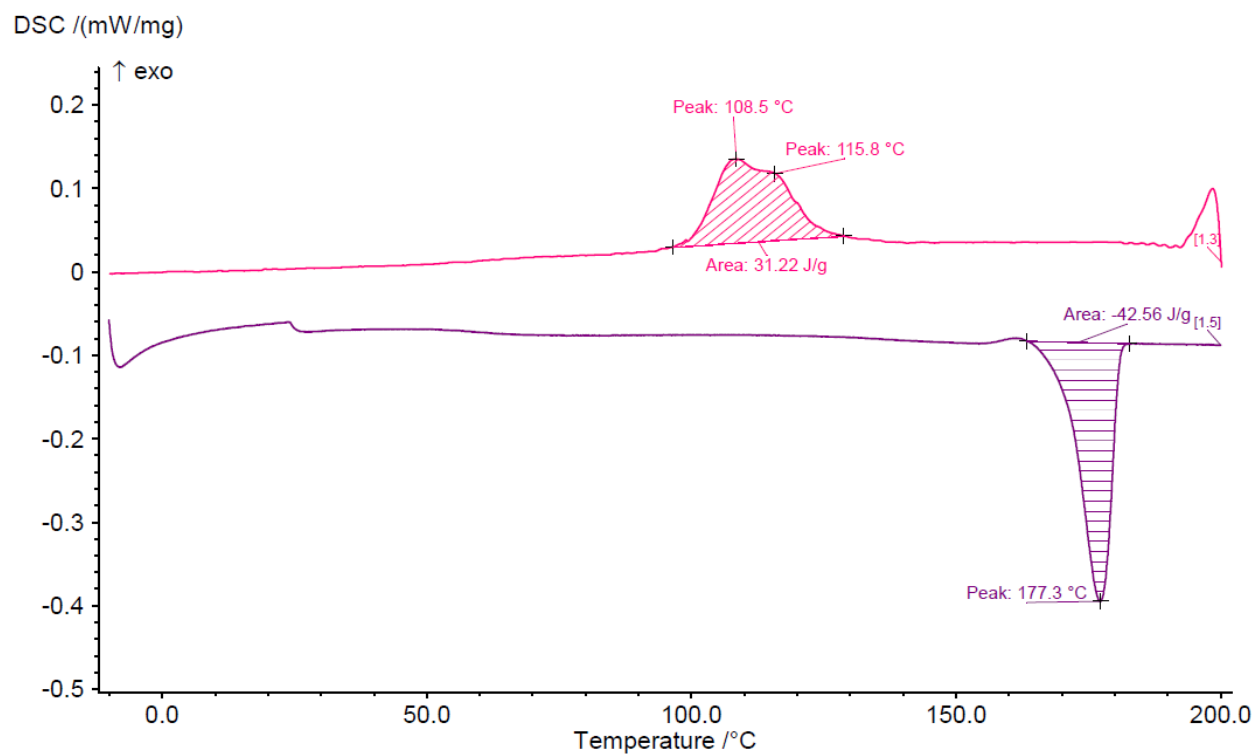

**Figure 10: DSC curve of espun PLLA/PMedX (85/15)**
